# Supplementary material for: A Comprehensive Phylogenetic Analysis of SARS-CoV-2: Utilizing a Novel and Convenient In-House RT-PCR Method for Characterization without Virus Culture and BSL-3 Facilities
Source: MDPI journal article supplement (doi:10.3390/v15071562), 2023-07-16
Supplement: s1 [file s1]

**Table S1.** Primer pairs and RT-PCR conditions

| Name     | Location I <sup>a</sup> | Sequence                         | Nonstructural proteins <sup>b</sup> | Coding region |
|----------|-------------------------|----------------------------------|-------------------------------------|---------------|
| nCoV-1F  | 1-24                    | 5'- ATTAAAGGTTTATACCTTCCCAGG -3' | nsp1                                | ORF1a         |
| nCoV-1R  | 1098-1076               | 5'- TTAAAGGGAATACAAAATTTGG -3'   | nsp1 & nsp2                         |               |
| nCoV-2F  | 1004-1026               | 5'- AAGAGCTATGAATTGCAGACACC -3'  | nsp2                                |               |
| nCoV-2R  | 2101-2081               | 5'- CCACTGCGAAGTCAACTGAAC -3'    | v1 nsp2                             |               |
| nCoV-3F  | 1997-2017               | 5'- CTGAGACTCATTGATGCTATG -3'    | nsp2                                |               |
| nCoV-3R  | 3124-3101               | 5'- ATCTTCAGTACCATACTCATATTG -3' | nsp2 & nsp3                         |               |
| nCoV-4F  | 3040-3059               | 5'- CCCTCCAGATGAGGATGAAG -3'     | nsp3                                |               |
| nCoV-4R  | 4132-4109               | 5'- ATCACCCACTATATATGGAGCATC -3' | nsp3                                |               |
| nCoV-5F  | 4036-4059               | 5'- TGACATTAATGGCAATCTTCATCC -3' | v2 nsp3                             |               |
| nCoV-5R  | 5102-5079               | 5'- GTGAATTATGAGGTTTTATTTAG -3'  | nsp3                                |               |
| nCoV-6F  | 4979-5002               | 5'- ACAACAGTAGACAACATTAACCTC -3' | nsp3                                |               |
| nCoV-6R  | 6100-6078               | 5'- AGTTAACTGGTTTAAATCATCAG -3'  | nsp3                                |               |
| nCoV-7F  | 6017-6040               | 5'- CAACCATATCCAAACGCAAGCTTC -3' | v3 nsp3                             |               |
| nCoV-7R  | 7104-7081               | 5'- GTTGCAATAGTGACATTAGTAGAG -3' | nsp3                                |               |
| nCoV-8F  | 6968-6990               | 5'- CTATTAAGTGTTGCCTAGGTTC -3'   | nsp3                                |               |
| nCoV-8R  | 8090-8067               | 5'- GTTTTCCATTGGTACGTAAAAG -3'   | nsp3                                |               |
| nCoV-9F  | 7973-7996               | 5'- CTGTTACTAGATCAGGCATTAGTG -3' | nsp3                                |               |
| nCoV-9R  | 9091-9067               | 5'- AGAACCTTCTAGTACATTGGTATC -3' | v4 nsp3 & nsp4                      |               |
| nCoV-10F | 8974-8997               | 5'- AGAGTACACTGACTTTGCAACATC -3' | nsp4                                |               |
| nCoV-10R | 10135-10112             | 5'- AAGTGATGTTGTACCACAAGTTAC -3' | nsp4 & nsp5                         |               |
| nCoV-11F | 10002-10025             | 5'- CTGATGTTCTTTACCAACCACCAC -3' | nsp5                                | ORF1a & ORF1b |
| nCoV-11R | 11069-11048             | 5'- AAGACCATTGAGTACTCTGGAC -3'   | nsp5 & nsp6                         |               |
| nCoV-12F | 10973-10996             | 5'- AGTGCAGTGAAAAGAACAATCAAG -3' | nsp6                                | ORF1b         |
| nCoV-12R | 12110-12089             | 5'- TAAACTCTGAGGCTATAGCTTG -3'   | nsp6, nsp7, & nsp8                  |               |
| nCoV-13F | 11998-12019             | 5'- GGTTCCTACTTTCTGTTTTG -3'     | nsp8                                |               |
| nCoV-13R | 13123-13101             | 5'- ACTAGCTAGATAATCTTTGTAAG -3'  | nsp8, nsp9, & nsp10                 |               |
| nCoV-14F | 12982-13004             | 5'- AGGTATGGTACTTGGTAGTTAG -3'   | nsp10                               |               |
| nCoV-14R | 14108-14085             | 5'- ATGAAATCACCGAAATCATACCAG -3' | nsp11, nsp12                        | ORF1b         |
| nCoV-15F | 13960-13981             | 5'- GTATACGCCAACTTAGGTGAAC -3'   | nsp12                               |               |
| nCoV-15R | 15135-15113             | 5'- AGTACTACAGATAGAGACACCAG -3'  | nsp12                               | ORF1b         |
| nCoV-16F | 15031-15053             | 5'- AAAAAACGTAATGTCATCCCTAC -3'  | nsp12                               |               |
| nCoV-16R | 16086-16065             | 5'- ATGAAAGACATCAGCATACTCC -3'   | nsp13                               |               |
| nCoV-17F | 15934-15955             | 5'- CCAGATCCATCAAGAATCCTAG -3'   | nsp12 & nsp13                       | ORF1b         |
| nCoV-17R | 17125-17104             | 5'- GAGCTAGGCCAATAGCAAAATG -3'   | nsp13                               |               |
| nCoV-18F | 17013-17035             | 5'- AGATGAGTTTTCTAGCAATGTTG -3'  | nsp13                               | ORF1b         |

|          |             |                                    |               |                                |
|----------|-------------|------------------------------------|---------------|--------------------------------|
| nCoV-18R | 18120-18101 | 5'- GAGGTGTGTAGGTGCCTGTG -3'       | nsp14         |                                |
| nCoV-19F | 18019-18040 | 5'- AGGAATGTGGCAACTTTACAAG -3'     | nsp14         |                                |
| nCoV-19R | 19070-19049 | 5'- GCTTGAGGTACACACTTAATAG -3'     | nsp14         |                                |
| nCoV-20F | 18928-18951 | 5'- CCTATAATTGGTGATGAACTGAAG -3'   | nsp14 & nsp15 |                                |
| nCoV-20R | 20119-20099 | 5'- ATGTGACTCCATTAAGACTAG -3'      | nsp15         |                                |
| nCoV-21F | 19994-20016 | 5'- GTAGAGTTGATGGTCAAGTAGAC -3'    | nsp15 & nsp16 |                                |
| nCoV-21R | 21077-21055 | 5'- GTAACATTTTTAGTCTTAGGGTC -3'    | nsp16         |                                |
| nCoV-22F | 20962-20984 | 5'- GACTTTGTCTCTGATGCAGATTC -3'    | nsp16         | ORF1b & S                      |
| nCoV-22R | 22103-22082 | 5'- CTTCAAGGTCCATAAGAAAAGG -3'     | nsp16         |                                |
| nCoV-23F | 22007-22030 | 5'- AACAAAAGTTGGATGGAAAGTGAG -3'   |               | S                              |
| nCoV-23R | 23131-23111 | 5'- AGTTGCTGGTGCATGTAGAAG -3'      | v5            |                                |
| nCoV-24F | 23040-23061 | 5'- AATCATATGGTTTCCAACCCAC -3'     |               |                                |
| nCoV-24R | 24116-24096 | 5'- CACAAATGAGGTCTCTAGCAG -3'      |               |                                |
| nCoV-25F | 24009-24031 | 5'- CATTATTGAAGATCTACTTTTC -3'     |               |                                |
| nCoV-25R | 25117-25096 | 5'- GCGGTCAATTTCTTTTGAATG -3'      |               |                                |
| nCoV-26F | 24988-25010 | 5'- ACCTGAATTAGACTCATTCAAGG -3'    |               | S & ORF3a                      |
| nCoV-26R | 26163-26143 | 5'- ATTAACAACCTCCGGATGAACC -3'     |               |                                |
| nCoV-27F | 26041-26063 | 5'- ACTCAATTGAGTACAGACACTGG -3'    |               | ORF3a, E, & M                  |
| nCoV-27R | 27126-27106 | 5'- CAATCCTGTAGCGACTGTATG -3'      |               |                                |
| nCoV-28F | 27024-27046 | 5'- ATCACTGTTGTACATCACGAAC -3'     |               | M, ORF6, ORF7a, ORF7b, & ORF 8 |
| nCoV-28R | 28143-28122 | 5'- AACAGGAACTGTATAATTACC -3'      |               |                                |
| nCoV-29F | 28038-28060 | 5'- GTAGGAGCTAGAAAATCAGCACC -3'    |               | ORF8 & N                       |
| nCoV-29R | 29116-29096 | 5'- TTGTTCTGGACCACGTCTGCC -3'      |               |                                |
| nCoV-30F | 28937-28958 | 5'- CTGCTGCTTGACAGATTGAACC -3'     |               | N & ORF10                      |
| nCoV-30R | 29861-29837 | 5'- CTAAGAAGCTATTAATAATCACATGG -3' |               |                                |

<sup>a</sup> Location from the start of NC045512 nucleotide sequence (Wuhan-Hu-1, coronavirus 2 isolate of severe acute respiratory syndrome, complete genome) 1 → 29870.

<sup>b</sup> Chan *et al.* provided predictions for the amino acid positions of nonstructural proteins as follows: nsp1 (M1 - G180), nsp2 (A181 - G818), nsp3 (A819 - G2763), nsp4 (K2764 - Q3263), nsp5 (S3264 - Q3569), nsp6 (S3570 - Q3859), nsp7 (S3860 - Q3942), nsp8 (A3943 - Q4140), nsp9 (N4141 - Q4253), nsp10 (A4254 - Q4392), nsp11 (S4393 - V4405), nsp12 (S4393 - Q5324), nsp13 (A5325 - Q5925), nsp14 (A5926 - Q6452), nsp15 (S6453 - Q6798), and nsp16 (S6799 - N7096).

#### RNA extraction:

Regarding the condensed extraction of RNA, the procedures are as follows:

1. Pipet 560 µl prepared Buffer AVL containing carrier RNA into a 1.5 ml microcentrifuge tube.
2. Add 140 µl plasma to the Buffer AVL-carrier RNA in the microcentrifuge tube. Mix by pulse-vortexing for 15 s. Incubate at room temperature for 10 min. Briefly centrifuge the tube to remove drops from the inside of the lid.

3. Add 560  $\mu$ l ethanol (96–100%) to the sample, and mix by pulse-vortexing for 15 s. After mixing, briefly centrifuge the tube to remove drops from inside the lid. (steps 1 - 3, total volume: 1260  $\mu$ l).

**Note: In this study, we utilized a double volume of plasma (2 \* 140  $\mu$ l) for each clinical sample. This means that each sample needed to be divided into two tubes (2 \* 1260  $\mu$ l) and subsequently pooled into a single extraction column.**

4. Carefully apply 630  $\mu$ l of the lysate from step 3 into the QIAamp Mini column (in a 2 ml collection tube) without wetting the rim. Avoid touching the QIAamp Mini column membrane with the pipette tip. Close the cap, and centrifuge at 6000  $\times$  g (8000 rpm) for 1 min. Place the QIAamp Mini column into a clean 2 ml collection tube, and discard the tube containing the filtrate.
5. Carefully open the QIAamp Mini column, and repeat step 4 until all of the lysate (2\* 1260  $\mu$ l) has been drawn through the QIAamp Mini column.
6. Carefully open the QIAamp Mini column, and add 500  $\mu$ l Buffer AW1 to the QIAamp Mini column without wetting the rim (in a 2 ml collection tube). Close the cap, and centrifuge at 6000  $\times$  g (8000 rpm) for 1 min. Place the QIAamp Mini column into a clean 2 ml collection tube, and discard the tube containing the filtrate.
7. Carefully open the QIAamp Mini column, and add 500  $\mu$ l Buffer AW2 to the QIAamp Mini column without wetting the rim (in a 2 ml collection tube). Close the cap, and centrifuge at 20000  $\times$  g (14000 rpm) for 3 min. Place the QIAamp Mini column into a clean 2 ml collection tube, and discard the tube containing the filtrate.
8. Place the QIAamp Mini column in a new 2 ml collection tube, and centrifuge at 20000  $\times$  g (14000 rpm) for 1 min.
9. Place the QIAamp Mini column in a clean 1.5 ml microcentrifuge tube. Discard the old collection tube containing the filtrate. Carefully open the QIAamp Mini column and add 60  $\mu$ l Buffer AVE equilibrated to room temperature. Close the cap, and incubate at room temperature for 15 min.
10. Centrifuge at 6000  $\times$  g (8000 rpm) for 2 min, and discard the QIAamp Mini column. Finally, the concentrated Viral RNA extraction was stored at -80°C.

#### RT-PCR conditions:

1. Real-time RT-PCR (Roche Lightcycler® multiplex RNA virus master, Cat No: 06754155001)

Briefly, the 20  $\mu$ L RT-qPCR mixture contained the RT enzyme solution, the RT-qPCR reaction mix, 10  $\mu$ M each of the forward and reverse primer, 5  $\mu$ M probe, 5  $\mu$ L extracted RNA or water for the controls without template. The samples were also processed and analyzed using the Roche Lightcycler 480 under the following conditions: 10 min at 50 °C and 30 s at 95 °C, followed by 45 cycles of 15 s at 95 °C and 53 s at 60 °C. The positive detection of COVID-19 was considered by the Taiwan CDC protocol when a sample was positive for the E, RdRp, and N genes. The samples were considered negative for COVID-19 if they were negative for the E and RdRp genes, or negative for the RdRp gene but positive for the E gene.

2. In-house RT-PCR
  - 2.1. cDNA synthesis (Thermo Scientific™ RevertAid RT Reverse Transcription Kit, Product code: 15255146)

| Component | Volume | Step | °C | Time | Cycles |
|-----------|--------|------|----|------|--------|
|-----------|--------|------|----|------|--------|

|                     |          |             |    |        |   |
|---------------------|----------|-------------|----|--------|---|
| Random primer       | 1 ul     | Optional    | 65 | 5 min  | 1 |
| Total RNA (~500 ng) | -        |             | 25 | 5 min  | 1 |
| Nuclease-free water | to 12 ul | RT reaction | 42 | 60 min | 1 |
| 5X Reaction Buffer  | 4 ul     | Extension   | 70 | 5 min  | 1 |
| 10 mM dNTP Mix      | 2 ul     | Hold        | 4  | ∞      | 1 |
| RNase Inhibitor     | 1 ul     |             |    |        |   |
| RevertAid RT        | 1 ul     |             |    |        |   |
| Total               | 20 ul    |             |    |        |   |

## 2.2. 1<sup>st</sup> PCR (Invitrogen™ Platinum™ SuperFi™ II DNA Polymerase, Cat No: 12361010)

| Component                            | Volume | Step                 | °C | Time   | Cycles |
|--------------------------------------|--------|----------------------|----|--------|--------|
| nCoV-1F/-11F (10 uM)                 | 1 ul   | Initial Denaturation | 98 | 30 s   | 1      |
| nCoV-20R/-30R (10 uM)                | 1 ul   | Denaturation         | 98 | 10 s   |        |
| cDNA                                 | 1 ul   | Annealing            | 60 | 10 s   | 35     |
| 5X SuperFi™ II Buffer                | 10 ul  | Extension            | 72 | 10 min |        |
| 10 mM dNTPs                          | 1 ul   | Final extension      | 72 | 5 min  | 1      |
| Platinum™ SuperFi™ II DNA polymerase | 1 ul   | Hold                 | 4  | ∞      |        |
| Water                                | 35 ul  |                      |    |        |        |
| Total                                | 50 ul  |                      |    |        |        |

## 2.3. Nested PCR (ALLin™ HiFi DNA Polymerase, Cat No: HLE0201)

| Component              | Volume  | Step                        | °C | Time   | Cycles |
|------------------------|---------|-----------------------------|----|--------|--------|
| 5x buffer              | 6 ul    | Initial Denaturation        | 95 | 1 min  | 1      |
| nCoV-xF (10 uM)        | 1.5 ul  | Denaturation                | 95 | 15 s   |        |
| nCoV-xR (10 uM)        | 1.5 ul  | Annealing (T <sub>m</sub> ) | 60 | 15 s   | 35     |
| PCR product            | 1 ul    | Extension                   | 72 | 3 min  |        |
| HS HiFi DNA polymerase | 0.3 ul  | Final extension             | 72 | 10 min | 1      |
| Nuclease-free water    | 19.7 ul | Hold                        | 4  | ∞      |        |
| Total                  | 30 ul   |                             |    |        |        |

Table S2. Using the complete genomic sequences, assess the cross-reactivity between SARS-CoV and SARS-CoV-2 by comparing the nucleotide locations of 30 primer pairs

|         | SARS-CoV-2 (Accession no. NC_045512) | SARS-CoV (Accession no. NC_004718) <sup>a</sup> |
|---------|--------------------------------------|-------------------------------------------------|
| nCoV-1F | 5'- ATTAAAGGTTTATACCTTCCCAGG -3'     | 5'- ATATTAGGTTTTTACCTACCCAGG -3'                |
| nCoV-1R | 5'- TTAAAGGGAAATACAAAATTTGG -3'      | 5'- TTAAGAGGAAACACAAACTTTGG -3'                 |
| nCoV-2F | 5'- AAGAGCTATGAATTGCAGACACC -3'      | 5'- AAGAGCTACGAGCACCAGACACC -3'                 |
| nCoV-2R | 5'- CCACTGCGAAGTCAACTGAAC -3'        | 5'- CCACTGAGAAGTCTGTTGTAC -3'                   |
| nCoV-3F | 5'- CTGAGACTCATTGATGCTATG -3'        | 5'- TTACGTCTTGTCGACGCCATG -3'                   |

|          |                                  |                                   |
|----------|----------------------------------|-----------------------------------|
| nCoV-3R  | 5'- ATCTTCAGTACCATACTCATATTG -3' | 5'- ATCCTCTGTACCGTACTCATGTTC -3'  |
| nCoV-4F  | 5'- CCCTCCAGATGAGGATGAAG -3'     | 5'- CCCTCCAGATGAGGAAGAAG -3'      |
| nCoV-4R  | 5'- ATCACCCACTATATATGGAGCATC -3' | 5'- ATCACCTACCATGTAAGGTGCATC -3'  |
| nCoV-5F  | 5'- TGACATTAATGGCAATCTTCATCC -3' | 5'- TGATATCAATGGTAAGCTTTACCA -3'  |
| nCoV-5R  | 5'- GTGAATTATGAGGTTTTATTTTAG -3' | 5'- GATTTACATGAGGTTTAATTTTGTG -3' |
| nCoV-6F  | 5'- ACAACAGTAGACAACATTAACCTC -3' | 5'- ACAACTGTGGACAACACTAATCTC -3'  |
| nCoV-6R  | 5'- AGTTAACTGGTTTAAATCATCAG -3'  | 5'- TGTCATTTGATTTAAATCATCAG -3'   |
| nCoV-7F  | 5'- CAACCATATCCAAACGCAAGCTTC -3' | 5'- CAACCATTACCAAATGCGAGTTTT -3'  |
| nCoV-7R  | 5'- GTTGCAATAGTGACATTAGTAGAG -3' | 5'- TCCATAGTAGTAACGTTAGACGAA -3'  |
| nCoV-8F  | 5'- CTATTAAGTGTTTGCCTAGGTTTC -3' | 5'- TTGTTAAGTATTTGCCTAGGTTTC -3'  |
| nCoV-8R  | 5'- GTTTTTCCATTGGTACGTTAAAAG -3' | 5'- GTTTTTCCATAGGAACACTAAAAG -3'  |
| nCoV-9F  | 5'- CTGTTACTAGATCAGGCATTAGTG -3' | 5'- CTGTTGCTTGACCAAGCTCTTGTA -3'  |
| nCoV-9R  | 5'- AGAACCTTCTAGTACATTGGTATC -3' | 5'- AGAACCTCTAGCAAATTAGTGTC -3'   |
| nCoV-10F | 5'- AGAGTACACTGACTTTGCAACATC -3' | 5'- TGAGTATAGTGATTTTGCTACCTC -3'  |
| nCoV-10R | 5'- AAGTGTAGTTGTACCACAAGTTAC -3' | 5'- AAGAGTTGTAGTTCCACAGGTTAC -3'  |
| nCoV-11F | 5'- CTGATGTTCTTTACCAACCACCAC -3' | 5'- CTGATGTTCTTACCAACCACCAC -3'   |
| nCoV-11R | 5'- AAGACCATTGAGTACTCTGGAC -3'   | 5'- GTGACCACTGTGTACTTTGAAC -3'    |
| nCoV-12F | 5'- AGTGCAGTGAAAAGAACAATCAAG -3' | 5'- GGTAAGTTCAAGAAAATTGTTAAG -3'  |
| nCoV-12R | 5'- TAAACTCTGAGGCTATAGCTTG -3'   | 5'- TAAATTCTGAAGCAATAGCCTG -3'    |
| nCoV-13F | 5'- GGTTTCACTACTTTCTGTTTTG -3'   | 5'- GGTTTCTCTTTTGTCTGTTTTG -3'    |
| nCoV-13R | 5'- ACTAGCTAGATAATCTTTGTAAG -3'  | 5'- ACTTGCTAGGTAATCCTTATATG -3'   |
| nCoV-14F | 5'- AGGTATGGTACTTGGTAGTTTAG -3'  | 5'- AGGTATGGTGCTGGGCAGTTTAG -3'   |
| nCoV-14R | 5'- ATGAAATCACCGAAATCATACCAG -3' | 5'- ACGAAATCACCGAAATCGTACCAG -3'  |
| nCoV-15F | 5'- GTATACGCCAACTTAGGTGAAC -3'   | 5'- GTATATGCTAACTTAGGTGAGC -3'    |
| nCoV-15R | 5'- AGTACTACAGATAGAGACACCAG -3'  | 5'- AGTACTACAGATAGAGACACCAG -3'   |
| nCoV-16F | 5'- ACAAACGTAATGTCATCCCTAC -3'   | 5'- ACTAAGCGTAATGTCATCCCTAC -3'   |
| nCoV-16R | 5'- ATGAAAGACATCAGCATACTCC -3'   | 5'- GTGAAAGACATCAGCATACTCC -3'    |
| nCoV-17F | 5'- CCAGATCCATCAAGAATCCTAG -3'   | 5'- CCAGATCCATCAAGAATATTAG -3'    |
| nCoV-17R | 5'- GAGCTAGGCCAATAGCAAAATG -3'   | 5'- GAGCAAGTCCGATGGCAAAATG -3'    |
| nCoV-18F | 5'- AGATGAGTTTTCTAGCAATGTTG -3'  | 5'- AGATGAGTTTTCTAGCAATGTTG -3'   |
| nCoV-18R | 5'- GAGGTGTGTAGGTGCCTGTG -3'     | 5'- GAGGTGTGTAGGTGCCTGTG -3'      |
| nCoV-19F | 5'- AGGAATGTGGCAACTTTACAAG -3'   | 5'- CGCAATGTGGCTACATTACAAG -3'    |
| nCoV-19R | 5'- GCTTGAGGTACACACTTAATAG -3'   | 5'- GCCTGAGGCACACACTTGATAG -3'    |
| nCoV-20F | 5'- CCTATAATTGGTGATGAACTGAAG -3' | 5'- CCTATTATAGGAGATGAACTGAGG -3'  |
| nCoV-20R | 5'- ATGTGACTCCATTAAAGACTAG -3'   | 5'- ATGTGACTCCATTGACGCTAG -3'     |
| nCoV-21F | 5'- GTAGAGTTGATGGTCAAGTAGAC -3'  | 5'- GTAGAGTGAAGGACAGGTAGAC -3'    |
| nCoV-21R | 5'- GTAACATTTTTAGTCTTAGGGTC -3'  | 5'- GTCACATGTTTGGTCTTAGGGTC -3'   |
| nCoV-22F | 5'- GACTTTGTCTCTGATGCAGATTC -3'  | 5'- GACTTCGTCTCCGACGCAGATTC -3'   |
| nCoV-22R | 5'- CTTCAAGGTCCATAAGAAAAGG -3'   | 5'- CTGAAACATCAAGCGAAAAGGC -3'    |
| nCoV-23F | 5'- AACAAAAGTTGGATGGAAAGTGAG -3' | 5'- A-CACAGAC---ACATACTATGAT -3'  |
| nCoV-23R | 5'- AGTTGCTGGTGCATGTAGAAG -3'    | 5'- CGTGGCCGGTGCATTTAAAAG -3'     |
| nCoV-24F | 5'- AATCATATGGTTTCCAACCCAC -3'   | 5'- ATGATTATGGTTTTTACACCAC -3'    |

|          |                                   |                                   |
|----------|-----------------------------------|-----------------------------------|
| nCoV-24R | 5'- CACAAATGAGGTCTCTAGCAG -3'     | 5'- CACAAATGAGATCTCTAGCAT -3'     |
| nCoV-25F | 5'- CATTTATTGAAGATCTACTTTTC -3'   | 5'- CTTTTATTGAGGACTTGCTCTTT -3'   |
| nCoV-25R | 5'- GCGGTCAATTTCTTTTTGAATG -3'    | 5'- GCGGTCAATTTCTTTTTGAATG -3'    |
| nCoV-26F | 5'- ACCTGAATTAGACTCATTCAAGG -3'   | 5'- ACCTGAGCTTGACTCATTCAAAG -3'   |
| nCoV-26R | 5'- ATTAACAACCTCCGGATGAACC -3'    | 5'- ATTAGCAACTCCTGAAGAGCC -3'     |
| nCoV-27F | 5'- ACTCAATTGAGTACAGACACTGG -3'   | 5'- ACACAAATTACTACAGACACTGG -3'   |
| nCoV-27R | 5'- CAATCCTGTAGCGACTGTATG -3'     | 5'- CAATACGGTAGCGGTTGTATG -3'     |
| nCoV-28F | 5'- ATCACTGTTGCTACATCACGAAC -3'   | 5'- ATCACTGTGGCTACATCACGAAC -3'   |
| nCoV-28R | 5'- AACAGGAACTGTATAATTACC -3'     | 5'- GGTGTGCATGTTTG-AACCATA -3'    |
| nCoV-29F | 5'- GTAGGAGCTAGAAAATCAGCACC -3'   | 5'- CTAGGGGTAATACTTATAGCACT -3'   |
| nCoV-29R | 5'- TTGTTCTGGACCACGTCTGCC -3'     | 5'- TTGTTCTGGACCACGTCTCCC -3'     |
| nCoV-30F | 5'- CTGCTGCTTGACAGATTGAACC -3'    | 5'- TTGCTGCTAGACAGATTGAACC -3'    |
| nCoV-30R | 5'- CTAAGAAGCTATTAAAATCACATGG -3' | 5'- CTAAGAAGCTATTAAAATCACATGG -3' |

<sup>a</sup> Using the nucleotide sequence of SARS-CoV-2 as a template, display the sequence of SARS-CoV at the corresponding positions.

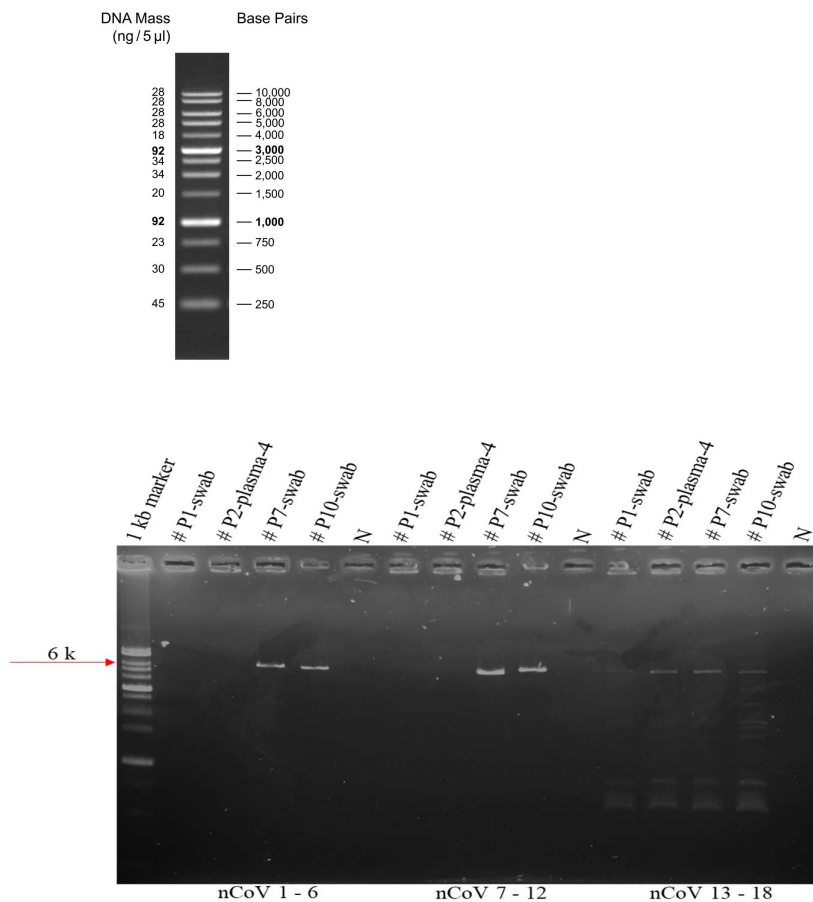

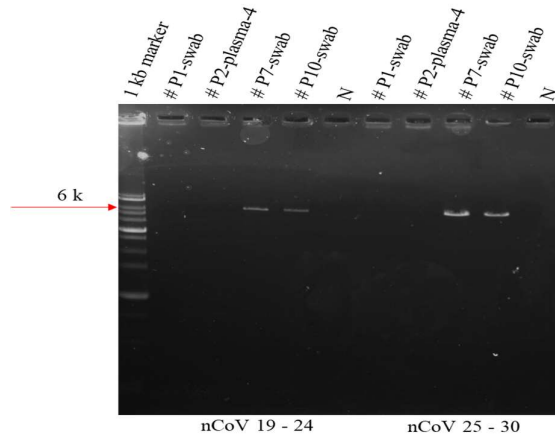

**Figure S1.** The results of the PCR products are loaded directly onto 1% agarose TBE gels after in-house RT-PCR. The loading volume for each lane is 4.5 ul (sample: dye = 9: 1) and uses a 1 kb DNA ladder as a marker. Whole genome sequences are separated into 5 fragments ( $\approx$  6 kb each). The location of all fragments is as follows: Fragment 1 (nCoV 1-6: 1 - 6078), Fragment 2 (nCoV 7-12: 6107 - 12089), Fragment 3 (nCoV 13-18: 11998 - 18101), Fragment 4 (nCoV 19-24: 18019 - 24096), and Fragment 5 (nCoV 25-30: 24009 - 29837).

|                           | 18 | 20 | 26 | 49 | 67 | 68 | 69 | 70 | 74 | 80 | 94 | 138 | 144 | 145 | 188 | 189 | 190 | 215 |
|---------------------------|----|----|----|----|----|----|----|----|----|----|----|-----|-----|-----|-----|-----|-----|-----|
| NC045512 CHN/Wuhan-Hu-1 B | L  | T  | P  | H  | A  | I  | H  | V  | N  | D  | S  | D   | Y   | Y   | N   | L   | R   | D   |
| Consensus B               | .  | .  | .  | —  | .  | .  | .  | —  | —  | .  | .  | .   | .   | .   | .   | .   | .   | .   |
| Consensus B_TWN only      | .  | .  | .  | —  | .  | .  | .  | —  | —  | .  | .  | .   | .   | .   | .   | .   | .   | .   |
| TWN/NYCU-P7               | .  | .  | .  | .  | .  | .  | .  | .  | .  | .  | .  | .   | .   | .   | .   | .   | .   | .   |
| TWN/NYCU-P10              | .  | .  | .  | .  | .  | .  | .  | .  | .  | .  | .  | .   | .   | .   | .   | .   | .   | .   |
| Consensus Alpha           | .  | .  | .  | .  | .  | —  | —  | —  | .  | .  | —  | .   | —   | —   | .   | .   | .   | .   |
| Consensus Alpha_TWN only  | .  | .  | .  | .  | .  | —  | —  | —  | .  | .  | —  | .   | —   | —   | .   | .   | .   | .   |
| Consensus Beta            | F  | .  | .  | .  | V  | .  | .  | .  | .  | A  | .  | .   | .   | .   | .   | .   | .   | G   |
| Consensus Beta_TWN only   | F  | .  | .  | .  | V  | .  | .  | .  | .  | A  | .  | .   | .   | .   | .   | .   | .   | G   |
| Consensus Gamma           | F  | N  | S  | .  | .  | .  | .  | .  | .  | .  | .  | Y   | .   | .   | .   | .   | S   | .   |
| Consensus Gamma_TWN only  | F  | N  | S  | .  | .  | .  | .  | .  | .  | .  | .  | Y   | .   | .   | —   | —   | —   | .   |

|                           | 221 | 242 | 243 | 244 | 245 | 416 | 417 | 484 | 501 | 570 | 614 | 655 | 677 | 681 | 682 | 701 | 716 | 797 |
|---------------------------|-----|-----|-----|-----|-----|-----|-----|-----|-----|-----|-----|-----|-----|-----|-----|-----|-----|-----|
| NC045512 CHN/Wuhan-Hu-1 B | S   | L   | A   | L   | H   | G   | K   | E   | N   | A   | D   | H   | Q   | P   | R   | A   | T   | F   |
| Consensus B               | .   | .   | .   | .   | .   | .   | .   | .   | .   | .   | .   | .   | .   | .   | .   | .   | .   | —   |
| Consensus B_TWN only      | .   | .   | .   | .   | .   | .   | .   | .   | .   | .   | .   | .   | .   | .   | .   | .   | .   | .   |
| TWN/NYCU-P7               | .   | .   | .   | .   | .   | .   | .   | .   | .   | .   | .   | .   | .   | .   | .   | .   | .   | .   |
| TWN/NYCU-P10              | .   | .   | .   | .   | .   | .   | .   | .   | .   | .   | .   | .   | .   | .   | .   | .   | .   | .   |
| Consensus Alpha           | .   | .   | .   | .   | .   | .   | .   | Y   | —   | G   | .   | .   | H   | .   | .   | I   | .   |     |
| Consensus Alpha_TWN only  | —   | .   | .   | .   | .   | —   | .   | Y   | D   | G   | .   | .   | H   | .   | .   | I   | .   |     |
| Consensus Beta            | .   | —   | —   | —   | —   | .   | K   | Y   | .   | G   | .   | —   | .   | —   | V   | .   | .   |     |
| Consensus Beta_TWN only   | .   | —   | —   | —   | —   | N   | K   | Y   | .   | G   | .   | —   | .   | —   | V   | .   | .   |     |
| Consensus Gamma           | .   | .   | .   | .   | .   | T   | K   | Y   | .   | G   | Y   | .   | .   | .   | .   | .   | .   |     |
| Consensus Gamma_TWN only  | .   | .   | .   | .   | .   | T   | K   | Y   | .   | G   | Y   | .   | .   | .   | .   | .   | .   |     |

|                           | 884 | 982 | 1027 | 1118 | 1176 | 1177 |
|---------------------------|-----|-----|------|------|------|------|
| NC045512 CHN/Wuhan-Hu-1 B | S   | S   | T    | D    | V    | N    |
| Consensus B               | .   | .   | .    | .    | .    | .    |
| Consensus B_TWN only      | —   | .   | .    | .    | .    | .    |
| TWN/NYCU-P7               | .   | .   | .    | .    | .    | .    |
| TWN/NYCU-P10              | .   | .   | .    | .    | .    | .    |
| Consensus Alpha           | .   | A   | .    | H    | .    | —    |
| Consensus Alpha_TWN only  | .   | A   | .    | H    | .    | .    |
| Consensus Beta            | .   | .   | .    | .    | .    | .    |
| Consensus Beta_TWN only   | .   | .   | .    | .    | .    | .    |
| Consensus Gamma           | .   | .   | I    | .    | F    | .    |
| Consensus Gamma_TWN only  | .   | .   | I    | .    | F    | .    |

<sup>a</sup> Location from the start of the NC045512.2 nucleotide sequence 21563-25384. The total length of the Spike protein is 1273 amino acids.

<sup>b</sup> The amino acids that differ from NC045512.2 are highlighted on their own. Deletion (-) and identical (.) amino acids are indicated; discord motifs within the same group are also shaded.

**Figure S2.** Comparison of amino acid usage patterns in spike protein between globally recognized variant strains and early cases of SARS-CoV-2 infection in Taiwan.

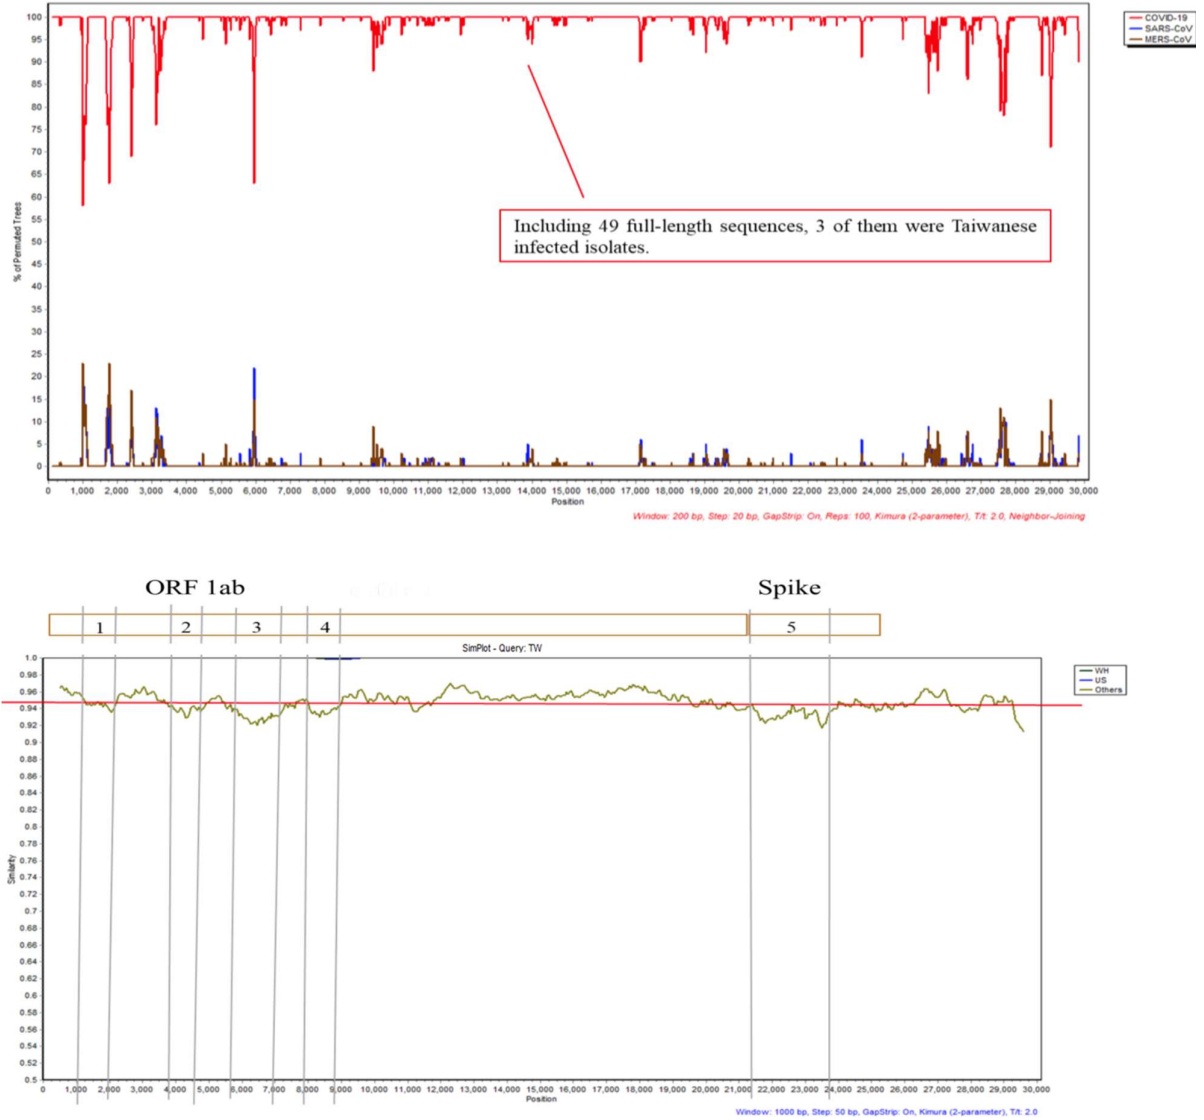

**Figure S3.** Using SimPlot (version 3.5.1) to determine the characteristics of the virus strain, putative recombinants, and their similarity. The upper part shows that 49 SARS-CoV-2 isolates belong to the same cluster, neither SARS-CoV nor MERS-CoV. The lower part presents 5 segments with worse similarity (< 95%, v1: 1000 - 2000, v2: 3750 - 4500, v3: 5600 - 7000, v4: 7800 - 8750, & v5: 21300 - 23750) than in other positions.



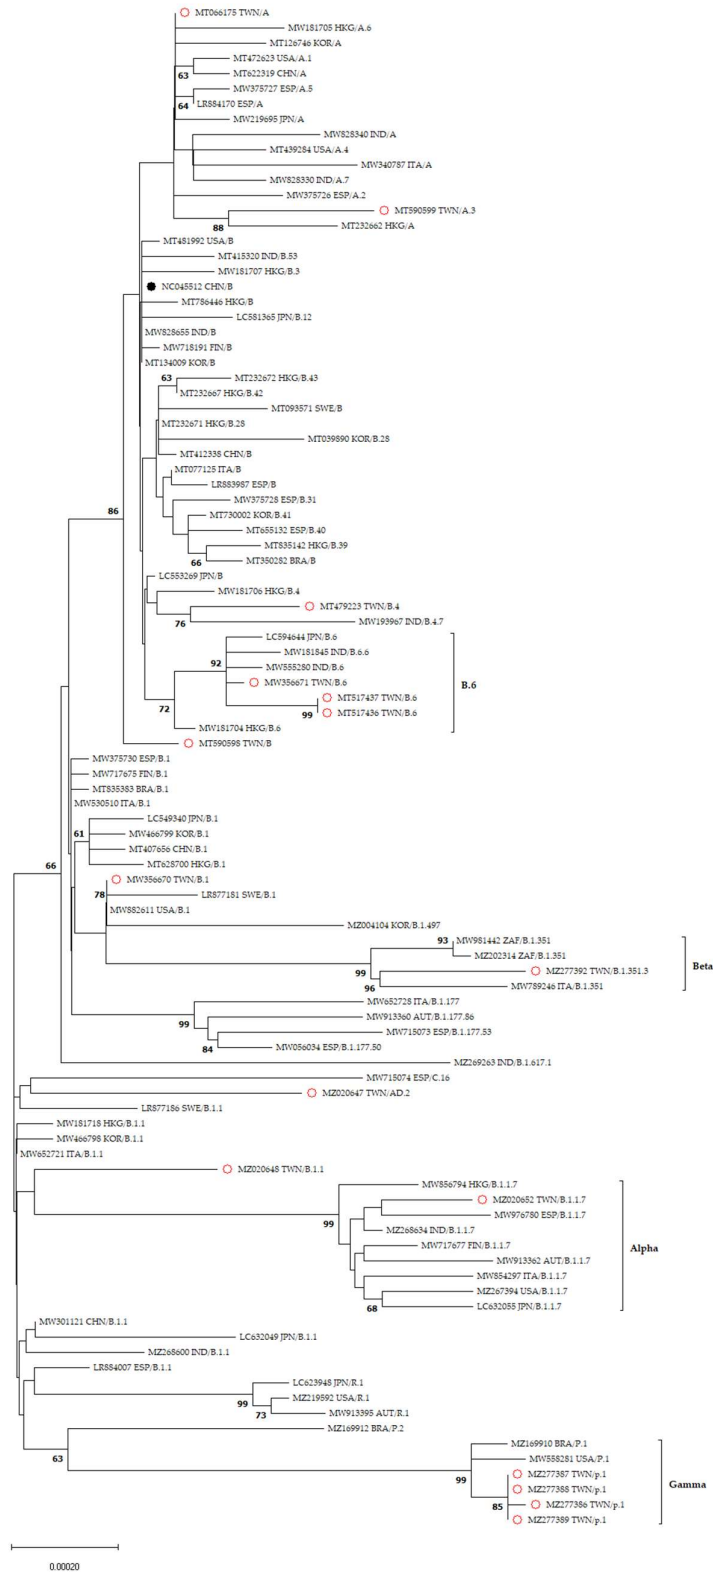

**Figure S4.** Phylogenetic analysis of SARS-CoV-2 strains that circulated throughout the world. There were 100 nucleotide sequences in the final dataset. Using neighbor-joining (NJ) and near full-length nucleotide sequences (29116 bp) to build an unrooted phylogenetic tree.

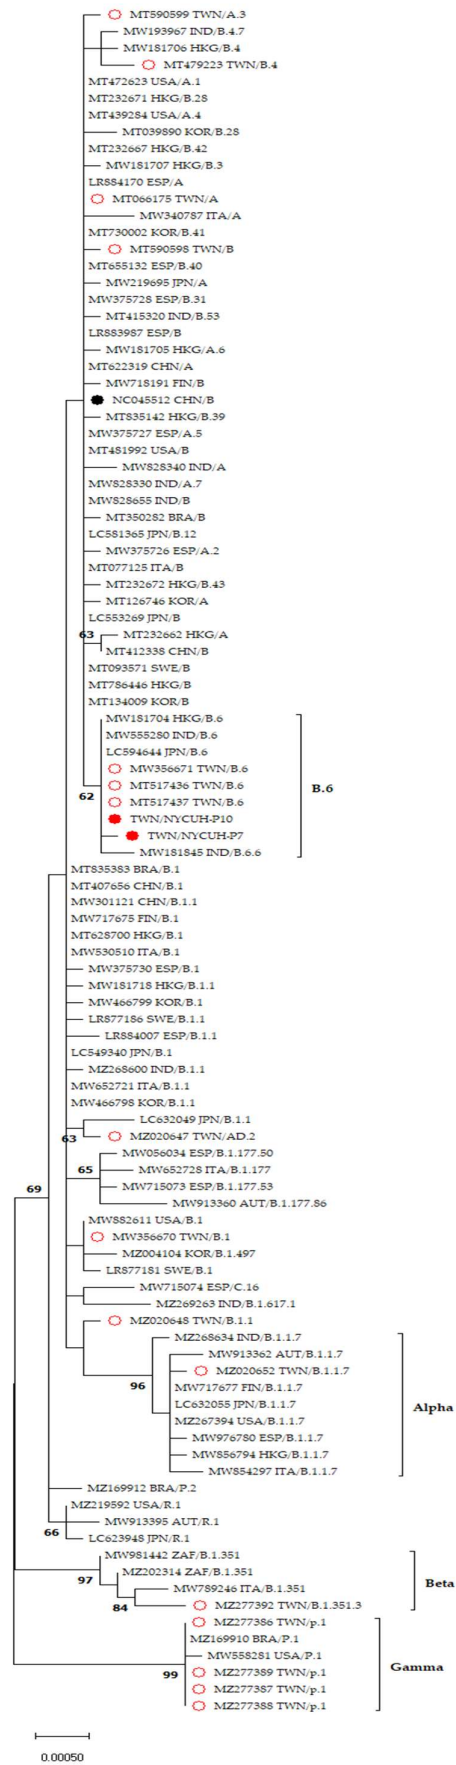

Figure S5a

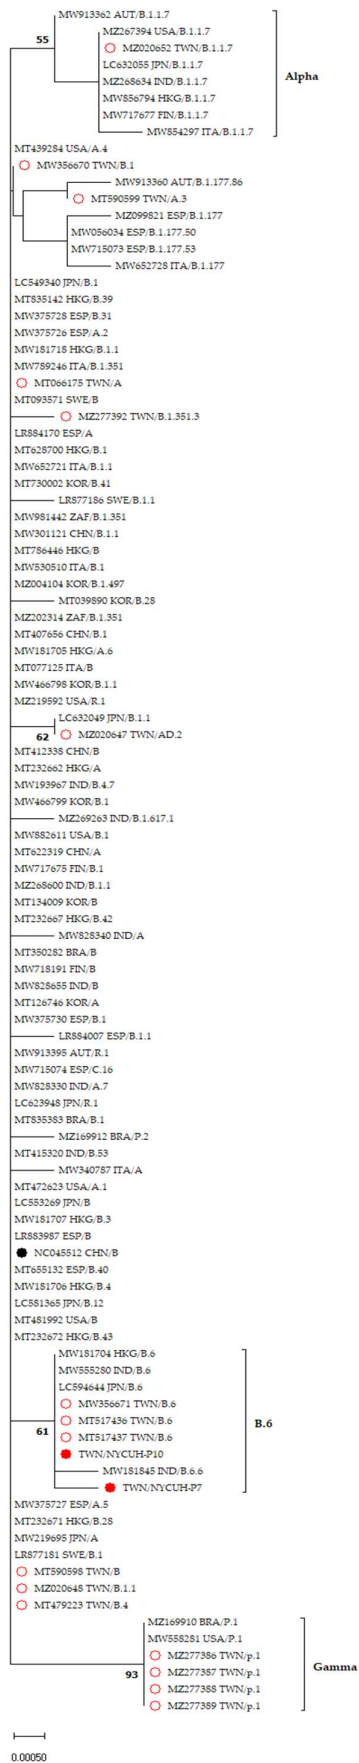

Figure S5b

**Figure S5.** Phylogenetic analysis of SARS-CoV-2 strains that circulated throughout the world. There were 102 nucleotide sequences in the final dataset. Using different lengths to build unrooted phylogenetic trees. Maximum likelihood (ML) trees based on the proposed method a) assembled sequence of all variant regions (v1 - v5, 6274 bp) and b) partial sequence of Nsp3/PLpro (v3 only, 1401 bp) aligned by the current study.
